# Supplementary material for: Long-Term Effectiveness and Safety of Dutasteride versus Finasteride in Patients with Male Androgenic Alopecia in South Korea: A Multicentre Chart Review Study
Source: PubMed Central journal article supplement — Ann Dermatol. 2022 Sep 27;34(5):349–59. doi: 10.5021/ad.22.027 (PMC9561294; doi:10.5021/ad.22.027), 2022-09-27
Supplement: ad-34-349-s002.pdf [file ad-34-349-s002.pdf]

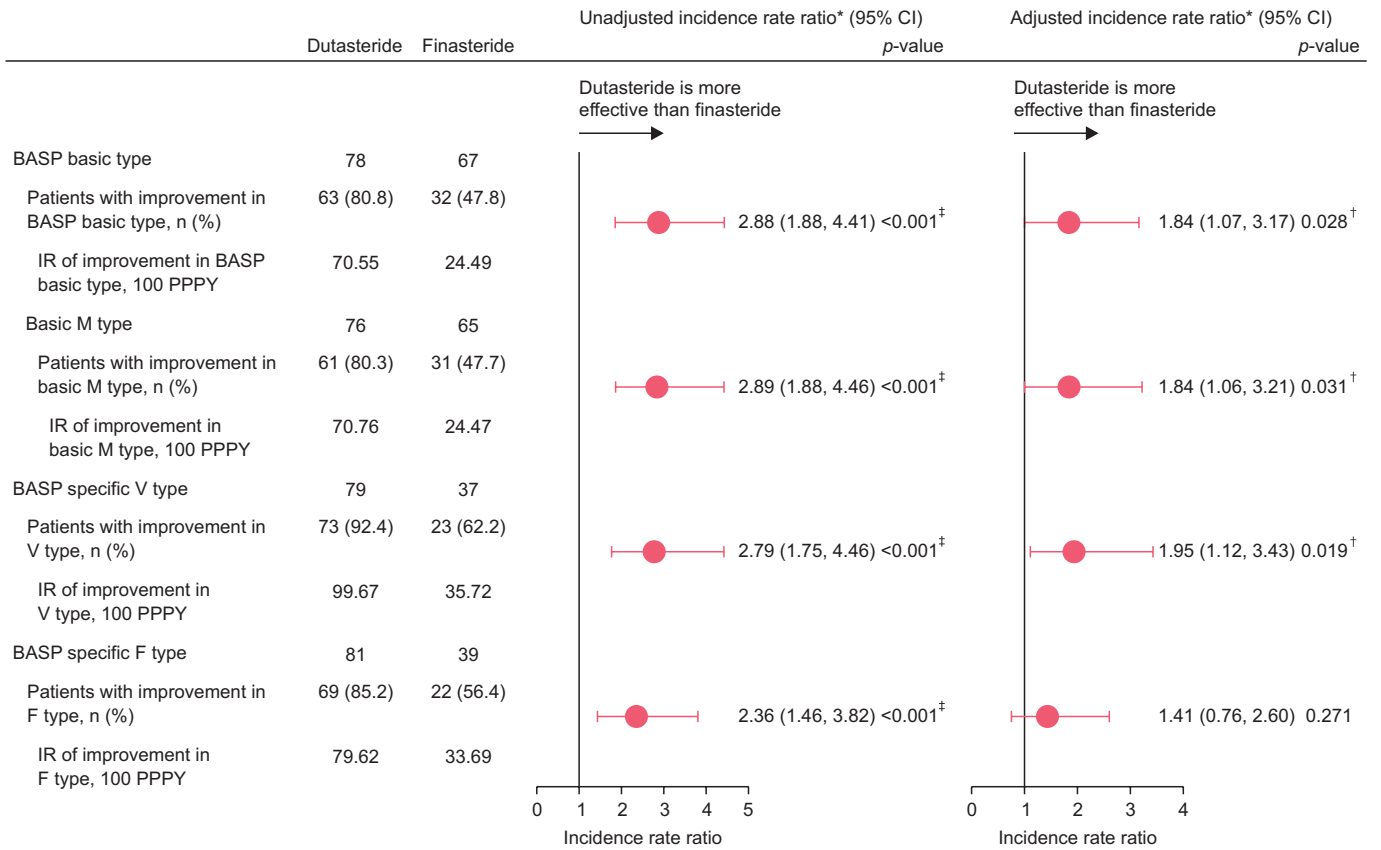

**Supplementary Fig. 2.** Effectiveness of dutasteride and finasteride among all patients. CI: confidence interval, BASP: basic and specific classification, IR: incidence rate, PPPY: per-person per-year. \*Multivariate models were adjusted for age at index date, study site, index year, any recent hair loss at baseline, any comorbidities at baseline, use of any treatment during baseline, and baseline severity of androgenic alopecia. Missing and 'no' values were combined into a single category for each variable. <sup>†</sup>Significant at the 0.05 level. <sup>‡</sup>Significant at the 0.001 level.
