# Supplementary material for: Long-Term Effectiveness and Safety of Dutasteride versus Finasteride in Patients with Male Androgenic Alopecia in South Korea: A Multicentre Chart Review Study
Source: PubMed Central journal article supplement — Ann Dermatol. 2022 Sep 27;34(5):349–59. doi: 10.5021/ad.22.027 (PMC9561294; doi:10.5021/ad.22.027), 2022-09-27
Supplement: ad-34-349-s004.pdf [file ad-34-349-s004.pdf]

| AE, n (%)                                                   | Dutasteride<br>(n=250) | Finasteride<br>(n=285) | Proportion<br>difference<br>(90% CI) | Equivalence region ( $\pm 5\%$ )             |    | Equivalence<br><i>p</i> -value* | Equivalence? |
|-------------------------------------------------------------|------------------------|------------------------|--------------------------------------|----------------------------------------------|----|---------------------------------|--------------|
|                                                             |                        |                        |                                      | -5%                                          | 5% |                                 |              |
|                                                             |                        |                        |                                      | Favours finasteride      Favours dutasteride |    |                                 |              |
| Any AE                                                      | 19 (7.6)               | 30 (10.5)              | 2.9 (-1.1, 7.0)                      |                                              |    | 0.201                           | No           |
| Any AE of special interest                                  | 4 (1.6)                | 3 (1.1)                | -0.5 (-2.2, 1.1)                     |                                              |    | <0.001 <sup>¶</sup>             | Yes          |
| Sexual AEs                                                  | 4 (1.6)                | 3 (1.1)                | -0.5 (-2.2, 1.1)                     |                                              |    | <0.001 <sup>¶</sup>             | Yes          |
| Decreased libido                                            | 3 (1.2)                | 2 (0.7)                | -0.5 (-1.9, 0.9)                     |                                              |    | <0.001 <sup>¶</sup>             | Yes          |
| Impotence/erectile dysfunction                              | 1 (0.4)                | 0 (0.0)                | -0.4 (-1.1, 0.3)                     |                                              |    | <0.001 <sup>¶</sup>             | Yes          |
| Other sexual dysfunction                                    | 0 (0.0)                | 1 (0.4)                | 0.4 (-0.2, 0.9)                      |                                              |    | <0.001 <sup>¶</sup>             | Yes          |
| Any other AE                                                | 17 (6.8)               | 27 (9.5)               | 2.7 (-1.2, 6.5)                      |                                              |    | 0.162                           | No           |
| Allergic reactions/swelling of lips and face/rash/urticaria | 1 (0.4)                | 2 (0.7)                | 0.3 (-0.7, 1.3)                      |                                              |    | <0.001 <sup>¶</sup>             | Yes          |
| Back pain                                                   | 1 (0.4)                | 0 (0.0)                | -0.4 (-1.1, 0.3)                     |                                              |    | <0.001 <sup>¶</sup>             | Yes          |
| Diarrhoea                                                   | 1 (0.4)                | 2 (0.7)                | 0.3 (-0.7, 1.3)                      |                                              |    | <0.001 <sup>¶</sup>             | Yes          |
| Dyspepsia                                                   | 1 (0.4)                | 1 (0.4)                | 0.0 (-0.9, 0.8)                      |                                              |    | <0.001 <sup>¶</sup>             | Yes          |
| Fatigue                                                     | 1 (0.4)                | 0 (0.0)                | -0.4 (-1.1, 0.3)                     |                                              |    | <0.001 <sup>¶</sup>             | Yes          |
| Other <sup>†</sup>                                          | 12 (4.8)               | 24 (8.4)               | 3.6 (0.1, 7.1)                       |                                              |    | 0.259                           | No           |
| Skin disorders <sup>‡</sup>                                 | 11 (4.4)               | 17 (6.0)               | 1.6 (-1.6, 4.7)                      |                                              |    | 0.036 <sup>  </sup>             | Yes          |
| Any SAE                                                     | 0 (0.0)                | 2 (0.7)                | 0.7 (-0.1, 1.5)                      |                                              |    | <0.001 <sup>¶</sup>             | Yes          |
| Serious cardiovascular event (e.g. cardiac failure, stroke) | 0 (0.0)                | 1 (0.4)                | 0.4 (-0.2, 0.9)                      |                                              |    | <0.001 <sup>¶</sup>             | Yes          |
| Other SAE <sup>§</sup>                                      | 0 (0.0)                | 1 (0.4)                | 0.4 (-0.2, 0.9)                      |                                              |    | <0.001 <sup>¶</sup>             | Yes          |

**Supplementary Fig. 4.** On-treatment AEs reported for dutasteride and finasteride among patients prescribed the recommended doses of dutasteride (0.5 mg daily) and finasteride (1 mg daily). CI: confidence interval, AE: adverse event, SAE: serious adverse event. \**p*-values were estimated from two one-sided tests to determine whether the 90% confidence interval for the differences in proportions were within the equivalence region, defined as  $\pm 5\%$ . *p*-values <0.05 indicate equivalence between treatments. <sup>†</sup>Other AEs were reported as open-ended responses and included skin disorders, herpes simplex, shoulder pain/herniated disc, ureter stone, abdominal wall lipoma, fever, gastroesophageal reflux and transient ischemic attack. <sup>‡</sup>Skin disorders included acne, eczema, erythema, erythematous papules, epidermal cyst, folliculitis, itching, psoriasis, rash, seborrheic dermatitis, seborrheic keratosis and tinea pedis. <sup>§</sup>Other SAEs included abdominal pain, acute colitis and schwannoma on the left neck, all of which resulted in hospitalizations. <sup>||</sup>Significant at the 0.05 level. <sup>¶</sup>Significant at the 0.001 level.
