# Supplementary material for: Long-Term Effectiveness and Safety of Dutasteride versus Finasteride in Patients with Male Androgenic Alopecia in South Korea: A Multicentre Chart Review Study
Source: PubMed Central journal article supplement — Ann Dermatol. 2022 Sep 27;34(5):349–59. doi: 10.5021/ad.22.027 (PMC9561294; doi:10.5021/ad.22.027), 2022-09-27
Supplement: ad-34-349-s005.pdf [file ad-34-349-s005.pdf]

Dutasteride vs. Finasteride in Male AGA

| AE, n (%)                                                      | Dutasteride<br>(n=295) | Finasteride<br>(n=305) | Proportion<br>difference<br>(90% CI) | Equivalence region ( $\pm 5\%$ )             |    |    | Equivalence<br><i>p</i> -value* | Equivalence? |
|----------------------------------------------------------------|------------------------|------------------------|--------------------------------------|----------------------------------------------|----|----|---------------------------------|--------------|
|                                                                |                        |                        |                                      | -5%                                          | 0% | 5% |                                 |              |
|                                                                |                        |                        |                                      | Favours finasteride      Favours dutasteride |    |    |                                 |              |
| Any AE                                                         | 23 (7.8)               | 34 (11.1)              | 3.4 (-0.6, 7.3)                      |                                              |    |    | 0.245                           | No           |
| Any AE of special interest                                     | 8 (2.7)                | 6 (2.0)                | -0.7 (-2.8, 1.3)                     |                                              |    |    | <0.001 <sup>  </sup>            | Yes          |
| Sexual AEs                                                     | 8 (2.7)                | 5 (1.6)                | -1.1 (-3.0, 0.9)                     |                                              |    |    | <0.001 <sup>  </sup>            | Yes          |
| Decreased libido                                               | 5 (1.7)                | 3 (1.0)                | -0.7 (-2.3, 0.8)                     |                                              |    |    | <0.001 <sup>  </sup>            | Yes          |
| Impotence/erectile dysfunction                                 | 3 (1.0)                | 1 (0.3)                | -0.7 (-1.8, 0.4)                     |                                              |    |    | <0.001 <sup>  </sup>            | Yes          |
| Other sexual dysfunction                                       | 0 (0.0)                | 1 (0.3)                | 0.3 (-0.2, 0.9)                      |                                              |    |    | <0.001 <sup>  </sup>            | Yes          |
| Diabetes mellitus                                              | 0 (0.0)                | 1 (0.3)                | 0.3 (-0.2, 0.9)                      |                                              |    |    | <0.001 <sup>  </sup>            | Yes          |
| Any other AE                                                   | 18 (6.1)               | 28 (9.2)               | 3.1 (-0.5, 6.6)                      |                                              |    |    | 0.187                           | No           |
| Allergic reactions/swelling of<br>lips and face/rash/urticaria | 1 (0.3)                | 2 (0.7)                | 0.3 (-0.6, 1.3)                      |                                              |    |    | <0.001 <sup>  </sup>            | Yes          |
| Back pain                                                      | 1 (0.3)                | 0 (0.0)                | -0.3 (-0.9, 0.2)                     |                                              |    |    | <0.001 <sup>  </sup>            | Yes          |
| Diarrhoea                                                      | 2 (0.7)                | 2 (0.7)                | 0.0 (-1.1, 1.1)                      |                                              |    |    | <0.001 <sup>  </sup>            | Yes          |
| Dyspepsia                                                      | 1 (0.3)                | 1 (0.3)                | 0.0 (-0.8, 0.8)                      |                                              |    |    | <0.001 <sup>  </sup>            | Yes          |
| Fatigue                                                        | 1 (0.3)                | 0 (0.0)                | -0.3 (-0.9, 0.2)                     |                                              |    |    | <0.001 <sup>  </sup>            | Yes          |
| Other <sup>†</sup>                                             | 12 (4.1)               | 25 (8.2)               | 4.1 (0.9, 7.3)                       |                                              |    |    | 0.327                           | No           |
| Skin disorders <sup>‡</sup>                                    | 11 (3.7)               | 18 (5.9)               | 2.2 (-0.7, 5.0)                      |                                              |    |    | 0.052                           | No           |
| Any SAE                                                        | 1 (0.3)                | 3 (1.0)                | 0.6 (-0.4, 1.7)                      |                                              |    |    | <0.001 <sup>  </sup>            | Yes          |
| Serious cardiovascular event<br>(e.g. cardiac failure, stroke) | 0 (0.0)                | 1 (0.3)                | 0.3 (-0.2, 0.9)                      |                                              |    |    | <0.001 <sup>  </sup>            | Yes          |
| Other SAE <sup>§</sup>                                         | 1 (0.3)                | 2 (0.7)                | 0.3 (-0.6, 1.3)                      |                                              |    |    | <0.001 <sup>  </sup>            | Yes          |

**Supplementary Fig. 5.** On-treatment AEs reported for dutasteride and finasteride among all patients. CI: confidence interval, AE: adverse event, SAE: serious adverse event. \**p*-values were estimated from two one-sided tests to determine if the differences in proportions are within the equivalence region, defined as  $\pm 5\%$ . *p*-values <0.05 indicate equivalence between treatments based on a pre-specified equivalence margin of 5%. <sup>†</sup>Other AEs were reported as open-ended responses and included skin disorders, herpes simplex, shoulder pain/herniated disc, ureter stone, abdominal wall lipoma, fever, gastroesophageal reflux and transient ischemic attack. <sup>‡</sup>Skin disorders included acne, eczema, erythema, erythematous papules, epidermal cyst, folliculitis, itching, psoriasis, rash, seborrheic dermatitis, seborrheic keratosis and tinea pedis. <sup>§</sup>Other SAEs included abdominal pain, acute colitis and schwannoma on the left neck, all of which resulted in hospitalizations. <sup>||</sup>Significant at the 0.001 level.
