# Supplementary material for: Long-Term Effectiveness and Safety of Dutasteride versus Finasteride in Patients with Male Androgenic Alopecia in South Korea: A Multicentre Chart Review Study
Source: PubMed Central journal article supplement — Ann Dermatol. 2022 Sep 27;34(5):349–59. doi: 10.5021/ad.22.027 (PMC9561294; doi:10.5021/ad.22.027), 2022-09-27
Supplement: ad-34-349-s006.pdf [file ad-34-349-s006.pdf]

|                                     | Dutasteride<br>(n=295) | Finasteride<br>(n=305) | Unadjusted IRD (90% CI) |                 | Adjusted IRD* (90% CI) |                                            |
|-------------------------------------|------------------------|------------------------|-------------------------|-----------------|------------------------|--------------------------------------------|
| All AEs, per 100 PY                 | 2.42                   | 3.52                   | 1.106                   | (-0.188, 2.400) | <i>Equivalent</i>      | 5.014 (0.311, 9.718) <i>Not equivalent</i> |
| AEs of special interest, per 100 PY | 0.82                   | 0.59                   | -0.235                  | (-0.854, 0.385) | <i>Equivalent</i>      | -                                          |
| Other AEs, per 100 PY               | 1.86                   | 2.85                   | 0.986                   | (-0.155, 2.127) | <i>Equivalent</i>      | 2.010 (-0.487, 4.506) <i>Equivalent</i>    |
| SAEs, per 100 PY                    | 0.10                   | 0.29                   | 0.189                   | (-0.132, 0.510) | <i>Equivalent</i>      | -                                          |

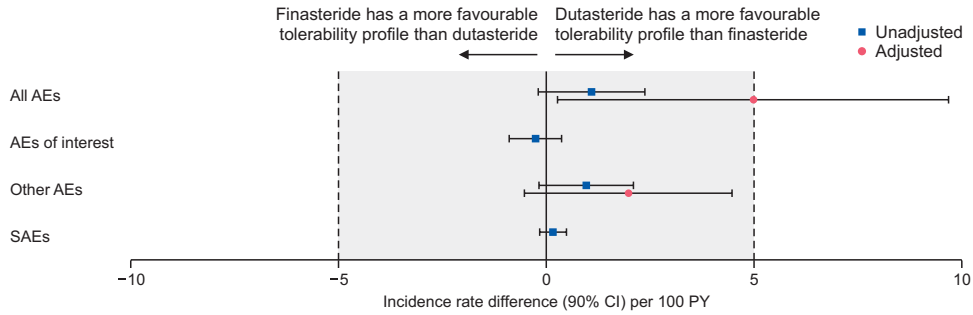

**Supplementary Fig. 6.** Incidence rates of AEs reported for dutasteride and finasteride among all patients. IRD: incidence rate difference, CI: confidence interval, AE: adverse event, PY: person-year, SAE: serious adverse event, BASP: basic and specific classification. \*Multivariate models were adjusted for age at androgenic alopecia diagnosis, time from diagnosis to index date, study site, index year, baseline hair loss (recent hair loss), presence of any comorbidities, baseline BASP severity, presence of any treatment during baseline. Missing values among the covariates were used as separate categories in models. Adjusted IR differences could not be produced for AEs of special interest and SAEs as there were very few events and models did not converge when covariates were included.
