# Supplementary figures and images for: Long-Term Effectiveness and Safety of Dutasteride versus Finasteride in Patients with Male Androgenic Alopecia in South Korea: A Multicentre Chart Review Study
Source: PubMed Central journal article supplement — Ann Dermatol. 2022 Sep 27;34(5):349–59. doi: 10.5021/ad.22.027 (PMC9561294; doi:10.5021/ad.22.027), 2022-09-27

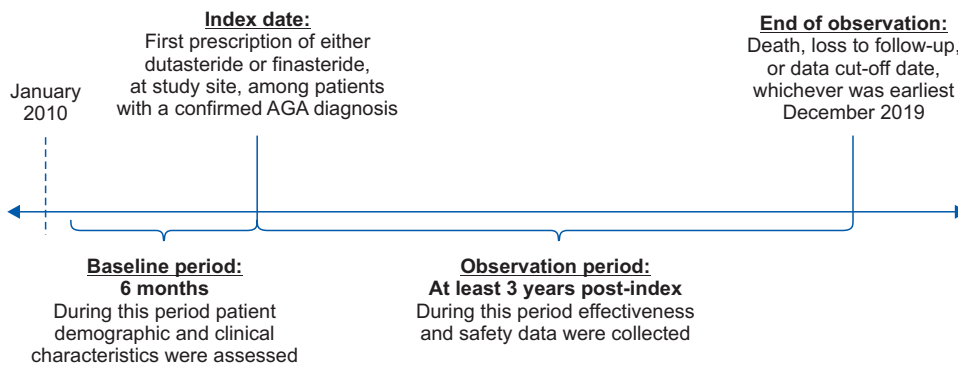

**Supplementary Fig. 1.** Study design schematic. AGA: androgenic alopecia.

Supplement: ad-34-349-s001.pdf [file ad-34-349-s001.pdf]
